# Supplementary material for: PRDX6 controls multiple sclerosis by suppressing inflammation and blood brain barrier disruption
Source: PubMed Central journal article supplement (PMC4673236; doi:10.18632/oncotarget.5205), 2015-08-17
Supplement: oncotarget-06-20875-s001.pdf [file oncotarget-06-20875-s001.pdf]

# PRDX6 controls multiple sclerosis by suppressing inflammation and blood brain barrier disruption

## Supplementary Material

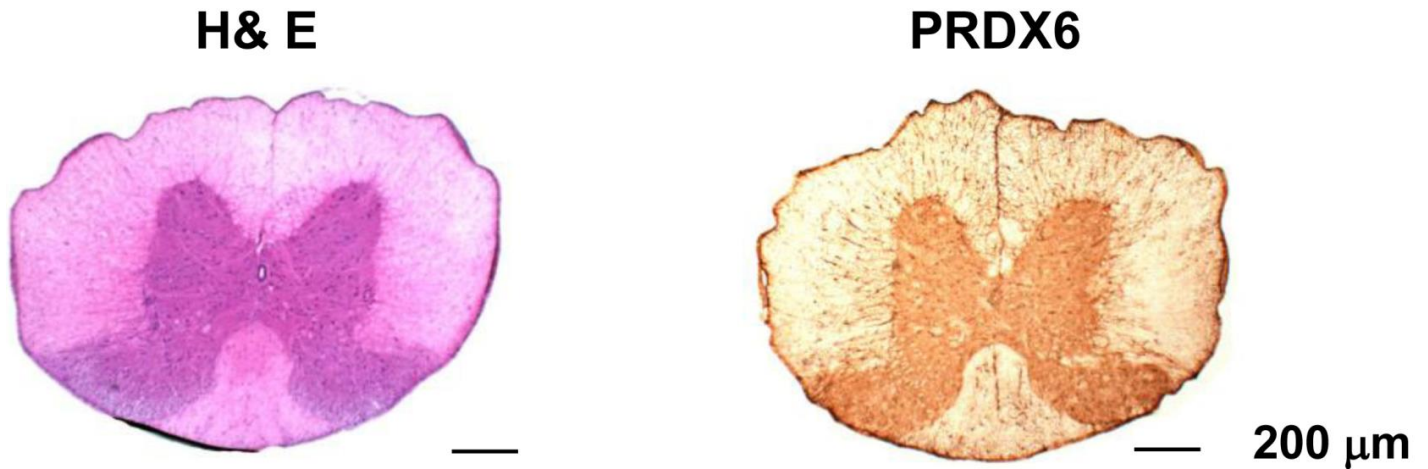

**S\_Figure 1. Expression of PRDX6 protein in mouse spinal cord.** Images show hematoxylin and eosin (H&E) staining of mouse spinal cord (*left*). The spinal cord section was incubated with specific antibodies against PRDX6 protein and then were detected by immunohistochemistry (*right*).

**A**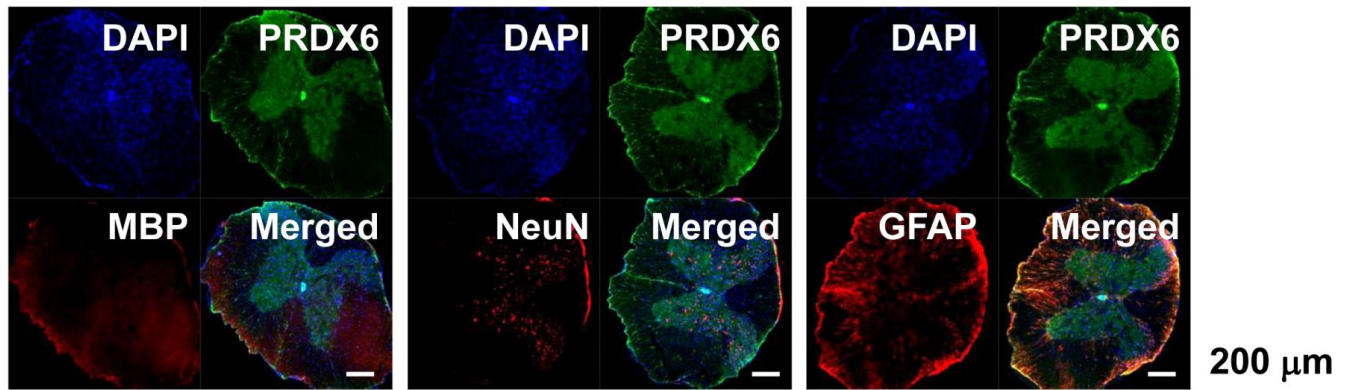**B**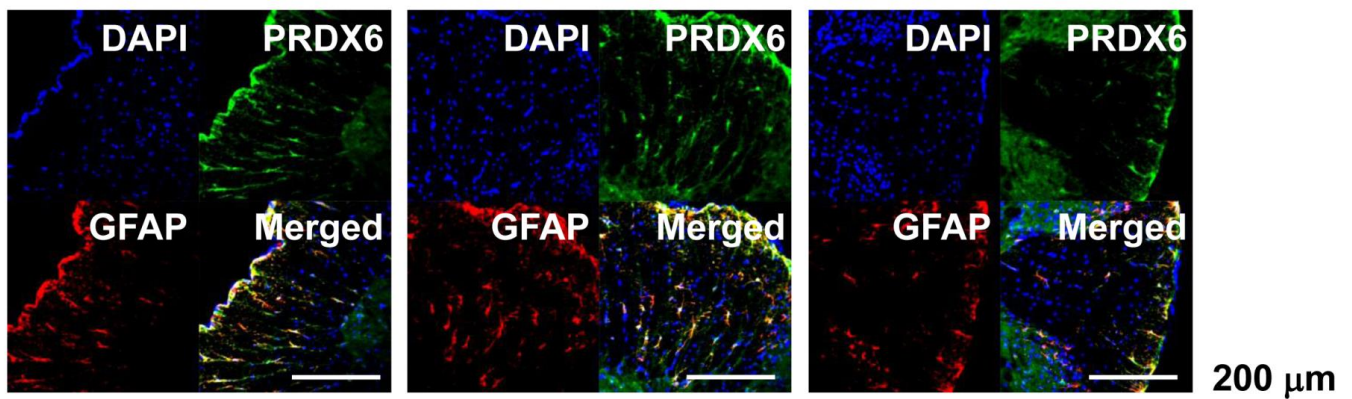

**S\_Figure 2. Specific expression of PRDX6 on astrocytes in mouse spinal cord.** (A) Immunofluorescence for PRDX6 (green) and MBP (red, oligodendrocyte marker), NeuN (red, neuron marker) or GFAP (red, astrocytes marker) was immunostained with rabbit anti-PRDX6 and mouse anti-MBP, -NeuN, or -GFAP antibodies in the mouse spinal cord, and then, sections were stained with DAPI (blue). (B) Magnified images show region containing dorsal and ventral column from immunofluorescence for PRDX6 and GFAP of A.

|          |        |             |           |            |             |            |              |            |               |              |
|----------|--------|-------------|-----------|------------|-------------|------------|--------------|------------|---------------|--------------|
| Ref spot |        | ADAMTS1     | AR        | Angiogenin | Ang-1       | Ang-3      | TF           | CXCL16     |               | Ref spot     |
|          | Cyr61  | DLL4        | DPPIV     | EGF        | Endoglin    | Endostatin | Endothelin-1 | FGF acidic | FGF basic     |              |
|          | KGF    | Fractalkine | GM-CSF    | HB-EGF     | HGF         | IGFBP-1    | IGFBP-2      | IGFBP-3    | IL-1 $\alpha$ | IL-1 $\beta$ |
|          | IL-10  | CXCL10      | CXCL1     | Leptin     | CCL2        | CCL3       | MMP-3        | MMP-8      | MMP-9         | NOV          |
|          | OPN    | PD-ECGF     | PDGF-AA   | PDGF-AB/BB | Pentraxin-3 | CXCL4      | PIGF-2       | Prolactin  | Proliferin    |              |
| Ref spot | CXCL12 | Serpin E1   | Serpin F1 | TSP-2      | TIMP-1      | TIMP-4     | VEGF         | VEGF-B     | Negative con  |              |

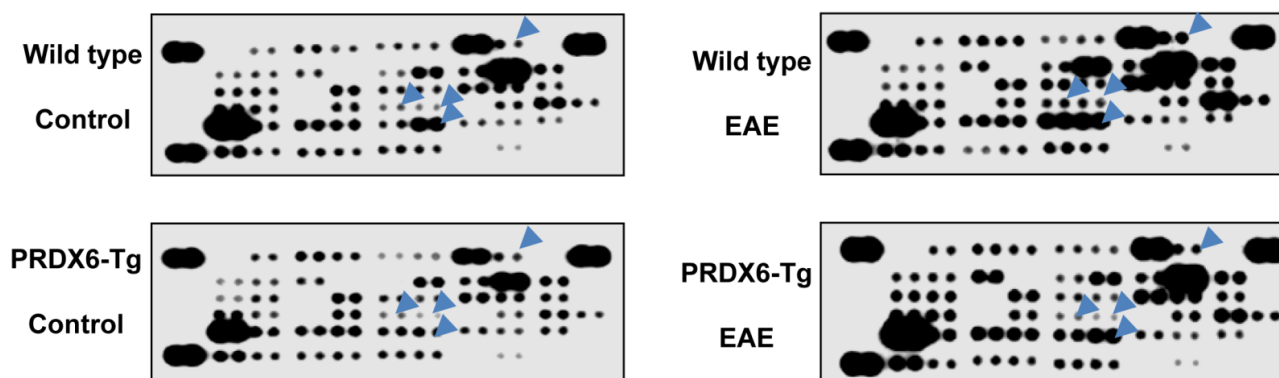

**S3\_Figure.** The long exposure band and original membrane of Mouse proteomic array in Figure 3C, D. PRDX6 attenuates the expression of chemokines. Blue arrow indicates CCL2, CCL3, CXCL16, and CXCL4.

S1\_Table. Upregulation of PRDX family in the EAE mouse model.

| <b>Probe ID</b> | <b>Ref Seq Accession</b> | <b>Gene Symbol</b> | <b>Entrez Gene ID</b> | <b>PRDX6 Tg/<br/>Non Tg</b> | <b>Gene Name</b> |
|-----------------|--------------------------|--------------------|-----------------------|-----------------------------|------------------|
| A_55_P2147427   | NM_011034                | Prdx 1             | 18477                 | <b>2.527413</b>             | peroxiredoxin 1  |
| A_55_P2176729   | NM_007453                | Prdx 6             | 11758                 | <b>3.61913</b>              | peroxiredoxin 6  |
| A_55_P2176731   | NM_007453                | Prdx 6             | 11758                 | <b>3.245044</b>             | peroxiredoxin 6  |
| A_55_P2103561   | NM_007453                | Prdx 6             | 11758                 | <b>2.489484</b>             | peroxiredoxin 6  |

S2\_Table. Differentiation between non-Tg EAE and PRDX6 EAE in immune system

| Probe ID      | Ref Seq Accession | Gene Symbol | Entrez Gene ID | PRDX6 Tg/ Non Tg | Gene Name                                                |
|---------------|-------------------|-------------|----------------|------------------|----------------------------------------------------------|
| A_52_P343306  | NM_010378         | H2-Aa       | 14960          | -7.045759        | histocompatibility 2, class II antigen A, alpha          |
| A_55_P2062246 | NM_001145164      | Tgtp2       | 1E+08          | -5.215047        | T cell specific GTPase 2                                 |
| A_55_P1981494 |                   | H2-B1       | 14963          | -4.094391        | histocompatibility 2, blastocyst                         |
| A_55_P2049647 | NM_001001892      | H2-K1       | 14972          | -4.226228        | histocompatibility 2, K1, K region                       |
| A_55_P1962747 | NM_207105         | H2-Ab1      | 14961          | -4.701439        | histocompatibility 2, class II antigen A, beta 1         |
| A_55_P2146560 | NM_207105         | H2-Ab1      | 14961          | -4.576559        | histocompatibility 2, class II antigen A, beta 1         |
| A_55_P2156731 | NM_010382         | H2-Eb1      | 14969          | -4.79502         | histocompatibility 2, class II antigen E beta            |
| A_55_P1978465 | NR_051981         | H2-Q5       | 15016          | -3.901872        | histocompatibility 2, Q region locus 5                   |
| A_51_P266248  |                   | Ighv14-2    | 668421         | -3.746982        | immunoglobulin heavy variable 14-2                       |
| A_51_P198434  | NM_001001892      | H2-K1       | 14972          | -4.226228        | histocompatibility 2, K1, K region                       |
| A_55_P2049647 | NM_001001892      | H2-K1       | 14972          | -3.609212        | histocompatibility 2, K1, K region                       |
| A_51_P237754  | NM_010398         | H2-T23      | 15040          | -3.333856        | histocompatibility 2, T region locus 23                  |
| A_51_P351860  | NM_009777         | C1qb        | 12260          | -3.308733        | complement component 1, q subcomponent, beta polypeptide |
| A_55_P1978506 | NM_023124         | H2-Q8       | 15019          | -3.164477        | histocompatibility 2, Q region locus 8                   |
| A_51_P497171  | NM_008534         | Ly9         | 17085          | -3.107275        | lymphocyte antigen 9                                     |
| A_51_P219789  | NM_010392         | H2-Q2       | 15013          | -3.072134        | histocompatibility 2, Q region locus 2                   |
| A_51_P390538  | NM_010821         | Mpeg1       | 17476          | -3.048441        | macrophage expressed gene 1                              |
| A_55_P1978424 | NM_007536         | Bcl2a1d     | 12047          | -2.982013        | B cell leukemia/lymphoma 2 related protein A1d           |
| A_51_P219789  | NM_010392         | H2-Q2       | 15013          | -2.892238        | histocompatibility 2, Q region locus 2                   |
| A_51_P502456  | NR_004446         | H2-K2       | 630499         | -2.832626        | histocompatibility 2, K region locus 2                   |
| A_51_P377452  | NM_008677         | Ncf4        | 17972          | -2.836214        | neutrophil cytosolic factor 4                            |
| A_65_P19395   | NM_010380         | H2-D1       | 14964          | -2.797097        | histocompatibility 2, D region locus 1                   |
| A_51_P102789  | NM_007574         | C1qc        | 12262          | -2.781987        | complement component 1, q subcomponent, C chain          |
| A_51_P110301  | NM_009778         | C3          | 12266          | -2.765408        | complement component 3                                   |
| A_51_P502456  | NR_004446         | H2-K2       | 630499         | -2.737348        | histocompatibility 2, K region locus 2                   |
| A_51_P469968  | NM_013819         | H2-M3       | 14991          | -2.701597        | histocompatibility 2, M region locus 3                   |
| A_55_P1978511 | NM_010394         | H2-Q7       | 15018          | -2.70247         | histocompatibility 2, Q region locus 7                   |
| A_51_P278868  | NM_010387         | H2-DMb1     | 14999          | -2.623058        | histocompatibility 2, class II, locus Mb1                |
| A_55_P2015363 | NM_023143         | C1ra        | 50909          | -2.190626        | complement component 1, r subcomponent A                 |

Table 4. Reverse transcriptase-polymerase chain reaction (RT-PCR) primers and conditions.

| Genes   | Primer Sequence (5'-3')              | Annealing Temp (°C) | Cycle Number |
|---------|--------------------------------------|---------------------|--------------|
| Prdx1   | F : 5'- TTTACCTGCCTGTTGGATACC -3'    | 56                  | 30           |
|         | R : 5'- GGAGAGACAGCTCAATGGTTAG -3'   |                     |              |
| Prdx2   | F: 5'- TGCTTGCTGACGTGACTAAA -3'      | 56                  | 30           |
|         | R: 5'- TTGACTGTGATCTGGCGAAG -3'      |                     |              |
| Prdx3   | F: 5'- CTAGGGACTTCTTGATGGCTAAC -3'   | 56                  | 30           |
|         | R:5'- GGCAGGCTAAGGGAAAGAAT -3'       |                     |              |
| Prdx4   | F: 5'- GACACTGCGTTTGGTTCAAG -3'      | 56                  | 30           |
|         | R: 5'- CCAGCTGGATCTGGGATTATT -3'     |                     |              |
| Prdx5   | F: 5'- GGAAGGCGACAGACTTATTATT -3'    | 56                  | 30           |
|         | R: 5'- CCTTCACTATGCCGTTGTCTATC -3'   |                     |              |
| Prdx6   | F : 5'- GCTTCCTTCTTGCTGGGAATAG -3'   | 56                  | 30           |
|         | R : 5'- GGAGAACAGGAACCAAGGAATTAG -3' |                     |              |
| β-actin | F : 5'- AATGTGGCTGAGGACTTTG -3'      | 58                  | 26           |
|         | R : 5'- GGGACTTCCTGTAACCACTTATT -3'  |                     |              |
